# Supplementary material
Source: publisher figshare collection journal article supplement (https://acs.figshare.com/ndownloader/files/13439453)
Supplement: Supplementary file 1 [file 13439453]

# Supporting information for: Statistical Mechanics of Globular Oligomer Formation by Protein Molecules

Alexander J. Dear,<sup>†</sup> Anđela Šarić,<sup>‡,¶</sup> Thomas C. T. Michaels,<sup>†,§</sup>

Christopher M. Dobson,<sup>†</sup> and Tuomas P. J. Knowles<sup>\*,†,||</sup>

<sup>†</sup>*Centre for Misfolding Diseases, Department of Chemistry, University of Cambridge,  
Lensfield Road, Cambridge CB2 1EW, UK*

<sup>‡</sup>*Department of Physics and Astronomy, Institute for the Physics of Living Systems,  
University College London, Gower Street, London WC1E 6BT, UK*

<sup>¶</sup>*Corresponding author for simulations. Email: a.saric@ucl.ac.uk*

<sup>§</sup>*Paulson School of Engineering and Applied Sciences, Harvard University, Cambridge, MA  
02138, USA*

<sup>||</sup>*Cavendish Laboratory, Department of Physics, University of Cambridge, J J Thomson  
Avenue, Cambridge CB3 0HE, UK*

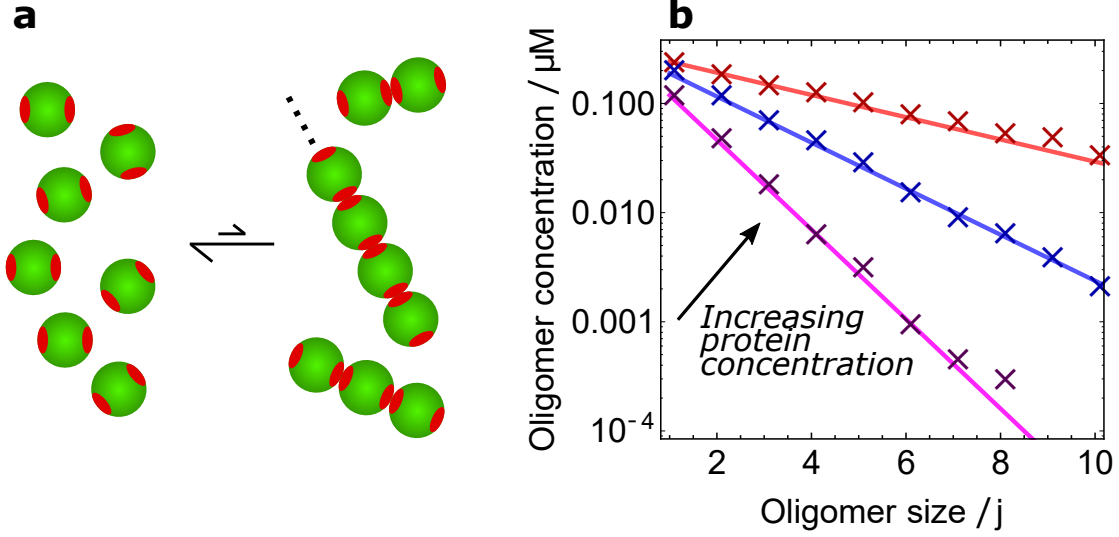

Figure S1: The analytical size distribution model for linear oligomers can be globally fitted to coarse-grained numerical Monte Carlo results (data points) with high accuracy.  $\Delta G^\circ = -15kT$ ;  $p = 0.3\mu\text{M}$  (purple);  $p = 1.3\mu\text{M}$  (blue);  $p = 5.3\mu\text{M}$  (red).

## Derivation of general statistical mechanical formulation for oligomers

This section is a reworking of material from ref. S1 and is included here for didactic purposes.

The grand canonical partition function is given by:

$$\Xi(T, V, \mu) = \sum_N^\infty Q(T, V, N) e^{\beta N \mu} \quad (1)$$

where  $Q(T, V, N)$  denotes the canonical partition function of a system that contains  $N$  molecules,  $\beta = 1/(k_B T)$  is the inverse temperature ( $k_B$  is the Boltzmann constant) and  $\mu$  is the chemical potential of the monomers. We consider the formation of oligomeric aggregates up to an arbitrary maximum size of  $M$  monomers. By assuming that the oligomers do not interact, the grand canonical partition function can be expressed in terms of the individual

oligomer partition functions:

$$\Xi(T, V, \mu) = \sum_{N_1=0}^{\infty} \sum_{N_2=0}^{\infty} \dots \sum_{N_M=0}^{\infty} \frac{(q_1(T, V) e^{\beta\mu})^{N_1}}{N_1!} \frac{(q_2(T, V) e^{\beta\mu})^{N_2}}{N_2!} \dots \frac{(q_M(T, V) e^{\beta\mu})^{N_M}}{N_M!}, \quad (2)$$

where  $q_j(T, V)$  is the canonical partition function of a  $j$ -mer. Eq. (2) can be re-summed to yield

$$\Xi(T, V, \mu) = \exp \left( \sum_{j=1}^M q_j(T, V) e^{\beta j \mu} \right). \quad (3)$$

From Eq. (3), the concentration of oligomers of size  $j$ ,  $f(j) \equiv N_j(T, V)/(N_A V)$ , is given by

$$f(j) = \frac{1}{N_A V} q(j) e^{\beta j \mu}, \quad (4)$$

where  $N_A$  is Avogadro's number and we have used the short hand notation  $q(j) \equiv q_j(T, V)$ . Note that the chemical potential  $\mu$  is set implicitly by letting  $M \rightarrow \infty$  in Eq. (3) and imposing the conservation-of-mass condition,  $p = \sum_{j=1}^{\infty} j f(j)$ , which can be written more conveniently as

$$p = -\frac{1}{N_A V} \frac{k_B T}{\Xi} \frac{\partial \Xi}{\partial \mu} \quad (5)$$

We must now address the partition function  $q(j)$ . This is given in general by a product of independent contributions from translational and internal degrees of freedom:  $q(j) = q_{\text{trans}}(j) q_{\text{int}}(j)$ . In particular, the translational partition function  $q_{\text{trans}}(j)$  is proportional to the system volume, and so can be written as  $q_{\text{trans}} = V/v_0(j)$ , where  $v_0(j)$  is a fundamental volume (in the gaseous phase, it is given by the cube of the thermal wavelength). Making this substitution, we arrive at Eq. 1 in the main text.

## Calculating the critical monomer concentration $m^*$

The maximum of the length distribution is found by solving  $df(j)/dj = 0$ :

$$\frac{df(j)}{dj} = \frac{1}{N_A v_0} \frac{d}{dj} e^{-\beta(\Delta G(j) - j\mu)} = f(j) \cdot -\beta \left( \frac{d\Delta G(j)}{dj} - \mu \right) = 0 \quad (6a)$$

$$\implies \frac{d\Delta G(j)}{dj} - \mu = \frac{5}{3} \frac{h}{\beta} j^{2/3} + \left( \frac{z_\infty}{2} G_b - \mu \right) - \frac{2}{3} j^{-1/3} \frac{z_\infty}{2} \alpha' G_b = 0. \quad (6b)$$

By making the substitution  $x = j^{1/3}$ , this can be transformed into the simpler problem  $\mathcal{F}(x) = 0$ , where:

$$\mathcal{F}(x) = ax^3 + cx + d \quad (7a)$$

$$= \frac{5}{3} \frac{h}{\beta} x^3 + \left( \frac{z_\infty}{2} G_b - \mu \right) x - \frac{z_\infty}{3} \alpha' G_b. \quad (7b)$$

We in fact need both a maximum and a minimum, so we need at least 2 real solutions to this equation. The cubic function must then cross the  $x$  axis three times. For this to happen it must possess two real stationary points  $x_\pm$ :

$$\mathcal{F}'(x) = 3ax^2 + c = 0 \implies x_\pm = \pm \sqrt{\frac{-c}{3a}}. \quad (8)$$

We thus need  $c = \frac{z_\infty}{2} G_b - \mu < 0$  as a necessary but not sufficient condition. This translates to a fairly tiny minimum monomer concentration so we look for a further constraint. We

need that the first of these stationary points gives a value of  $\mathcal{F} > 0$ , and the second  $\mathcal{F} < 0$ :

$$\mathcal{F}(x_{\pm}) = \pm a \left( \frac{-c}{3a} \right)^{3/2} \pm c \left( \frac{-c}{3a} \right)^{1/2} + d \quad (9a)$$

$$= \pm \left( \frac{(-c)^3}{27a} \right)^{1/2} \mp (-c)^{2/2} \left( \frac{-c}{3a} \right)^{1/2} + d \quad (9b)$$

$$= \pm \frac{1}{3} \left( \frac{(-c)^3}{3a} \right)^{1/2} \mp \left( \frac{(-c)^3}{3a} \right)^{1/2} + d \quad (9c)$$

$$\therefore \mathcal{F}(x_-) = \frac{2}{3} \left( \frac{(-c)^3}{3a} \right)^{1/2} + d, \quad \mathcal{F}(x_+) = -\frac{2}{3} \left( \frac{(-c)^3}{3a} \right)^{1/2} + d. \quad (9d)$$

Given that  $d > 0$ , the first condition is always satisfied. To satisfy the second, we require (using  $z_{\infty} = 12$ ):

$$\frac{2}{3} \left( \frac{(-c)^3}{3a} \right)^{1/2} > d \quad (10a)$$

$$(-c)^3 > 3a \frac{9d^2}{4} = 5 \frac{h}{\beta} \frac{(-z_{\infty} \alpha' G_b)^2}{4} \quad (10b)$$

$$\mu - 6G_b > \left( \frac{5h}{\beta} \right)^{1/3} (-6\alpha' G_b)^{2/3}. \quad (10c)$$

This gives the critical monomer concentration:

$$m^* = \frac{1}{N_A v_0} e^{\beta \mu} = \frac{1}{N_A v_0} \exp \left( 6\beta G_b + (5h)^{1/3} (-6\alpha' \beta G_b)^{2/3} \right). \quad (11)$$

The value  $x^*$  for which the roots merge, or for which  $\Delta = 0$ , is given by  $9d/2\Delta_0 = -3d/2ac$ , which gives the location of the new maximum:

$$j^* = \frac{d}{2} = -\frac{6\alpha' \beta G_b}{5h}. \quad (12)$$

## Head group sterics

We expect that head groups have some translational, rotational and conformational degrees of freedom, and that these are restricted through steric interactions upon addition of amphiphiles to a micelle. Indeed, it is known that head group size can influence micelle geometry as a result of these interactions.<sup>S2</sup> This free energy penalty for formation of larger micelles was neglected by Chandler *et al*, presumably because it is small relative to the connectivity-enforcing energy penalty.

We here verify this hypothesis by calculating the steric penalty explicitly. In previous MT approaches, this has been dealt with using a test particle approach,<sup>S3</sup> yielding the expression:

$$G_{\text{st}} = -jkT \ln \left[ 1 - \frac{a_h}{a} \right], \quad (13)$$

where  $a_h$  is the average cross-sectional area of the head group (in our Monte Carlo simulations  $\pi\sigma^2/4$ ), and  $a$  is the core surface area per monomer. We first calculate  $a$  for spherical micelles:

$$V = jv = \frac{4}{3}\pi r^3 \implies r = \left( \frac{3jv}{4} \right)^{1/3} \quad (14a)$$

$$a = \frac{S}{j} = \frac{Sv}{V} = \frac{3v}{r} \quad (14b)$$

$$\therefore a = 3v \left( \frac{4}{3jv} \right)^{1/3} = \left( \frac{36v^2}{j} \right)^{1/3}. \quad (14c)$$

Now since  $v$  scales with  $\sigma^3$ , we have the scaling behaviour for  $G_{\text{st}}$ :

$$G_{\text{st}} \simeq -jkT \ln \left[ 1 - Cj^{\frac{1}{3}} \right], \quad (15)$$

with constant  $C$ . Thus,  $G_{\text{st}}$  has lower scaling with  $j$  than the connectivity-enforcing free energy penalty ( $j^{5/3}$ ). Furthermore,  $C$  is given approximately by:

$$C < \frac{\pi\sigma^2/4}{(36\sigma^6)^{1/3}} \simeq 0.24. \quad (16)$$

We see, therefore, that not only does the head-group steric repulsion free energy term scale less strongly with  $j$  than the connectivity-enforcing term, but that also its coefficient is less than half of the magnitude of the connectivity-enforcing term’s coefficient (found from fitting to be  $h = 0.58$ ). Thus it is reasonable to neglect the steric contribution for modelling the Monte Carlo simulations, and oligomers in general.

## Computing $h$ analytically

The term  $h$  in the model can be computed from a knowledge of the geometry of amphiphiles within micelles. Specifically,  $h$  is given approximately by the formula:

$$h \simeq 0.75(\xi/\delta)^{4/3}, \tag{17}$$

where  $\delta$  is the “length” of the hydrophobic segment, or its greatest distance from the hydrophilic segment, and  $\xi$  is the “width” of the hydrophobic segment, or its average linear dimension perpendicular to its length. In the case of our simulations we may identify  $\xi = \sigma$ . Moreover, we may calculate the length of the hydrophobic segment as the how far we may move one monomer along the length of another whilst maintaining their interaction. This gives  $\delta = 1.33\sigma$ . Feeding these numbers into Eq. (17) gives  $h \simeq 0.51$ . This is in reasonably good agreement with our fitted value of  $h = 0.58$ . The agreement can be improved by explicitly including the steric term computed in the previous section in the model when fitting; doing so yields a fitted value of  $h = 0.49$ .

## References

- (S1) Iljina, M.; Garcia, G. A.; Dear, A. J.; Flint, J.; Narayan, P.; Michaels, T. C. T.; Dobson, C. M.; Frenkel, D.; Knowles, T. P. J.; Klenerman, D. Quantitative analysis of co-oligomer formation by amyloid- $\beta$  peptide isoforms. *Sci. Rep.* **2016**, *6*, 28658.

- (S2) Tanford, C. Theory of micelle formation in aqueous solutions. *J. Phys. Chem.* **1974**, *78*, 2469–2479.
- (S3) Puvvada, S.; Blankshtein, D. Molecular-thermodynamic approach to predict micellization, phase behavior and phase separation of micellar solutions. I. Application to nonionic surfactants. *J. Chem. Phys.* **1990**, *92*, 3710–3724.
